# Supplementary material for: Bicolour, large area, inkjet-printed metal halide perovskite light emitting diodes
Source: Royal Society of Chemistry journal article supplement (doi:10.1039/d3mh02025h), 2024-01-01
Supplement: d3mh02025h1.pdf [file d3mh02025h1.pdf]

## ELECTRONIC SUPPLEMENTARY INFORMATION

### **Bicolour, large area, inkjet-printed metal halide perovskite light emitting diodes**

Vincent R. F. Schröder,<sup>a</sup> Nicolas Fratzscher,<sup>b</sup> Nicolas Zorn Morales,<sup>b</sup> Daniel Steffen Rühl,<sup>b</sup>  
Felix Hermerschmidt,<sup>\*b</sup> Eva L. Unger<sup>c,d,e</sup> and Emil J. W. List-Kratochvil<sup>\*a,b</sup>

- a. Helmholtz-Zentrum Berlin für Materialien und Energie GmbH, Hahn-Meitner-Platz 1, 14109 Berlin, Germany
- b. Institut für Physik, Institut für Chemie, Humboldt-Universität zu Berlin, IRIS Adlershof, Zum Großen Windkanal 2, 12489 Berlin, Germany
- c. Department Solution Processing of Hybrid Materials & Devices, Helmholtz-Zentrum Berlin für Materialien und Energie, Kekuléstraße 5, 12489 Berlin, Germany
- d. Institut für Chemie, IRIS Adlershof, Humboldt Universität zu Berlin, Zum Großen Windkanal 2, 12489 Berlin, Germany
- e. Chemical Physics and NanoLund, Lund University, PO Box 124, 22100 Lund, Sweden

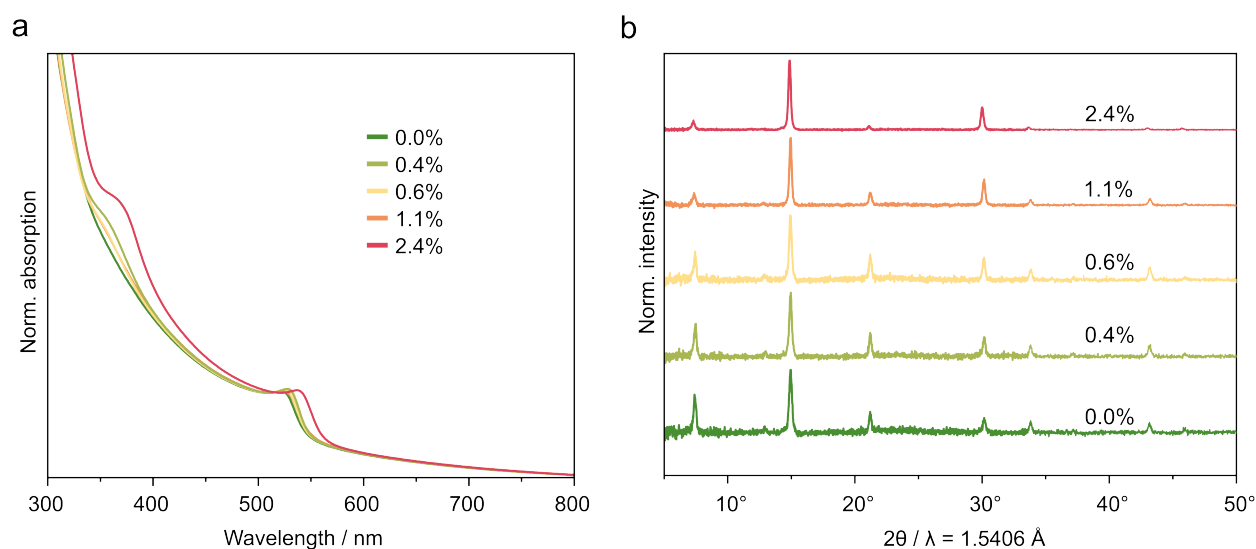

**Figure S1:** (a) Full view of the UV-vis spectra shown in Figure 2 b, showing the shift of the absorption edge of the patterned perovskite layers with increasing nominal iodide concentration. (b) Full view XRD pattern of the patterned perovskite layers.

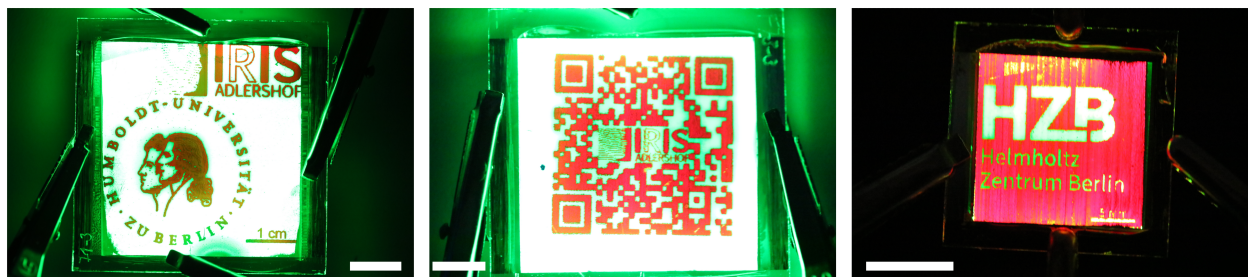

**Figure S2:** Large area, dual coloured PeLEDs. Scale bar indicates 1 cm.

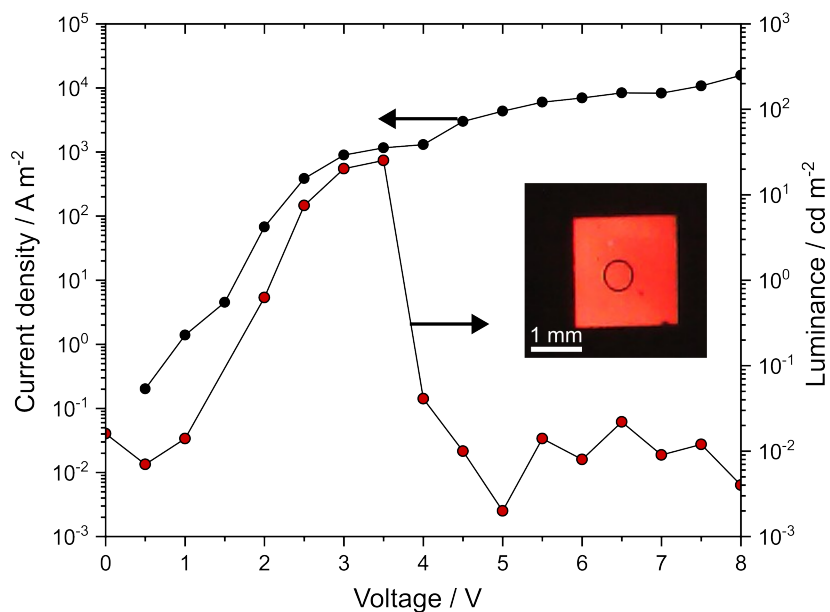

**Figure S3:** Current density-luminance-voltage characteristics of a pure red light emitting PeLED using  $\text{PEA}_2\text{MA}_3\text{Pb}_4\text{I}_{13}$  as emitter layer. This layer was printed in a single step, no mixing of the perovskite inks took place. A maximum luminance of  $25 \text{ cd m}^{-2}$  was achieved.

### Calculation of nominal iodide content

The nominal  $\text{I}^-/\text{Br}^-$  ratio ( $R_{\text{I}/\text{Br}}$ ) was calculated from the volume ( $V_{\text{drop}}$ ) of a single printed droplet, the number of printed droplets per area ( $N_{\text{drops}}$ ) taken from the nominal printing resolution and the concentration of perovskite precursors in the ink ( $c$ ). This yields the molarity of perovskite precursors in the printed ink. To yield the  $\text{I}^-/\text{Br}^-$  ratio, the stoichiometry ( $f$ ) of both inks ( $\text{MAPbBr}_3$  and  $\text{PEA}_2\text{MA}_3\text{Pb}_4\text{I}_{13}$ ) needs to be considered.

$$R_{\text{I}/\text{Br}} = \frac{n_{\text{I}}}{n_{\text{Br}}} = \frac{V_{\text{drop,I}} \times N_{\text{drop,I}} \times c_{\text{I}} \times f_{\text{I}}}{V_{\text{drop,Br}} \times N_{\text{drop,Br}} \times c_{\text{Br}} \times f_{\text{Br}}}$$

The drop volume for the deposition of bromide inks and iodide ink are nominally 30 pL and 1 pL. Determination of the drop volume with the built-in analyser tool of the LP50 inkjet printer revealed a significant spread of drop volume with a mean volume of 24 pL (Figure S2). Determination of the real drop volume of the (nominal) 1 pL printhead was not possible with the LP50 analyser tool. The number of deposited droplets corresponds to the printing resolution of the  $\text{Br}^-$ -based MHP film (350 dpi) and the drop spacing of the  $\text{I}^-$ -based precursor ink on the  $\text{Br}^-$  MHP layer. A drop distance of 250  $\mu\text{m}$ , 200  $\mu\text{m}$ , 150  $\mu\text{m}$ , 100  $\mu\text{m}$  correspond here to a resolution of 102 dpi, 127 dpi, 169 dpi and 254 dpi. The resolution must be squared, to yield the number of drops per area  $N_{\text{drop}}$  (drops per square inch). The concentration of bromide ink is 0.125 M and 0.031 M for the iodide ink. The stoichiometric factors are 3 and 13 respectively.

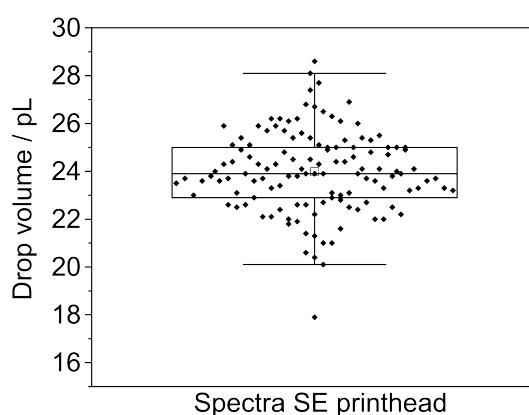

**Figure S4:** Determined drop volume of the 128 nozzles of a Spectra SE printhead with a nominal drop volume of 30 pL.
